### Corrigendum

**Ratcliffe, J. M. and Fullard, J. H.** (2005). The adaptive function of tiger moth clicks against echolocating bats: an experimental and synthetic approach. *J. Exp. Biol.* **208**, 4689-4698

There was an error in the legend to Fig. 3. The published version reads:

Parameter functions for three gleaning echolocation call sequences of an individual *M. septentrionalis*. (A) Attack on non-arctiid moth; (B) attack on muted *C. tenera*; (C) attack on intact *C. tenera*. See Fig. 1 for further details.

The correct version should read:

Fig. 3. Parameter functions for three aerial hawking echolocation call sequences of an individual *M. septentrionalis*. (A) Attack on non-arctiid moth; (B) attack on muted *C. tenera*; (C) attack on intact *C. tenera*. See Fig. 1 for further details.

The authors apologise for this mistake and any inconvenience caused to readers.
